# Supplementary material for: Repeated freezing induces a trade-off between cryoprotection and egg production in the goldenrod gall fly,Eurosta solidaginis
Source: Oxford University Press journal article supplement (doi:10.1242/jeb.177956), 2018-01-01
Supplement: jeb177956supp.pdf [file jeb177956supp.pdf]

**Table S1. The effects of freezing temperature exposure on egg production in *Eurosta solidaginis*.** Values are generalized linear model (quasipoisson distribution) statistics comparing egg production in adult *Eurosta solidaginis* as a result of cold exposure type (repeated exposures or a single exposure), at different temperatures (-10, -15, or -20 °C) as overwintering prepupae. Repeatedly-exposed prepupae received 3, 6, or 10 freezing events of 12 h duration (number of exposures), at a time interval of 1, 5, or 10 days (period between exposures), while prolonged freeze prepupae received a single 120 h freezing exposure either in January or in March (time of year exposed). Retained terms with significant p-values ( $p < 0.05$ ) are in bold typeface.

| <b>Exposure type</b>   | <b>Initial model</b>                                                                  | <b>Minimal adequate model</b> | <b>Term</b>                              | <b>F</b>                    | <b>df</b>                      | <b>P</b>                         |
|------------------------|---------------------------------------------------------------------------------------|-------------------------------|------------------------------------------|-----------------------------|--------------------------------|----------------------------------|
| Repeated               | Y = body mass + exposure temperature × period between exposures × number of exposures | Y = body mass                 | <b>Body mass</b>                         | <b>102.4</b>                | <b>1, 148</b>                  | <b>&lt;0.001</b>                 |
| Prolonged              | Y = body mass + exposure temperature × time of year exposed                           | Y = body mass                 | <b>Body mass</b>                         | <b>41.31</b>                | <b>1, 29</b>                   | <b>&lt;0.001</b>                 |
| Repeated vs. prolonged | Y = body mass + exposure type                                                         | Y = body mass + exposure type | <b>Body mass</b><br><b>Exposure type</b> | <b>140.4</b><br><b>3.91</b> | <b>1, 178</b><br><b>1, 178</b> | <b>&lt;0.001</b><br><b>0.048</b> |

**Table S2. The effects of freezing temperature exposure on survival to adulthood in *Eurosta solidaginis*.** Values are generalized linear model (binomial distribution) statistics comparing survival to eclosion in *Eurosta solidaginis* as a result of cold exposure type (repeated exposures or a single exposure), at different temperatures (-10, -15, or -20 °C) as overwintering prepupae. Repeatedly-exposed prepupae received 3, 6, or 10 freezing events of 12 h duration (number of exposures), at a time interval of 1, 5, or 10 days (period between exposures), while prolonged freeze prepupae received a single 120 h freezing exposure either in January or in March (time of year exposed). Retained terms with significant p-values ( $p < 0.05$ ) are in bold typeface.

| Exposure type          | Initial model                                                             | Minimal adequate model                                                     | Term                              | Df           | P                |
|------------------------|---------------------------------------------------------------------------|----------------------------------------------------------------------------|-----------------------------------|--------------|------------------|
| Repeated               | Y = exposure temperature × period between exposures × number of exposures | Y = exposure temperature + period between exposures + temperature × period | Temperature                       | 1, 25        | 0.282            |
|                        |                                                                           |                                                                            | Number                            | 2, 21        | 0.340            |
|                        |                                                                           |                                                                            | Period                            | 2, 23        | 0.100            |
|                        |                                                                           |                                                                            | <b>Temperature × Period</b>       | <b>2, 19</b> | <b>0.019</b>     |
|                        |                                                                           |                                                                            | <b>Temperature × Number</b>       | <b>2, 17</b> | <b>&lt;0.001</b> |
|                        |                                                                           |                                                                            | <b>Number × Period</b>            | <b>4, 13</b> | <b>0.012</b>     |
| Prolonged              | Y = exposure temperature × time of year exposed                           | Y = exposure temperature × time of year exposed                            | Temperature                       | 1, 3         | 0.808            |
|                        |                                                                           |                                                                            | Time of year                      | 1, 4         | 0.380            |
|                        |                                                                           |                                                                            | <b>Temperature × Time of year</b> | <b>1, 2</b>  | <b>0.026</b>     |
|                        |                                                                           |                                                                            | <b>Exposure type</b>              | <b>4, 10</b> | <b>&lt;0.001</b> |
| Repeated vs. prolonged | Y = exposure type × temperature                                           | Y = exposure type + exposure temperature                                   | <b>Exposure temperature</b>       | <b>1, 9</b>  | <b>0.013</b>     |

**Table S3. The effects of freezing temperature exposure on supercooling point (SCP) in *Eurosta solidaginis* prepupae.** Values are ANOVA statistics comparing supercooling point (°C) in *Eurosta solidaginis* prepupae as a result of cold exposure type (repeated exposures, a single exposure, or control conditions at 0 °C), at different temperatures (-10, -15, or -20 °C) as overwintering prepupae. Repeatedly-exposed prepupae received 3, 6, or 10 freezing events of 12 h duration (number of exposures), at a time interval of 1, 5, or 10 days (period between exposures), while prolonged freeze prepupae received a single 120 h freezing exposure either in January or in March (time of year exposed). Control prepupae were sampled in January, February, and March (time of year sampled). Reported effect sizes are from a linear model with the same terms and represent total change (in °C) due to the term. Retained terms with significant p-values ( $p < 0.05$ ) are in bold typeface.

| Exposure type                      | Initial model                                                           | Minimal adequate model                                                  | Term                                                              | F            | Df            | P (effect size)           |
|------------------------------------|-------------------------------------------------------------------------|-------------------------------------------------------------------------|-------------------------------------------------------------------|--------------|---------------|---------------------------|
| Repeated                           | Y = exposure temperature × frequency of exposures × number of exposures | Y = exposure temperature × frequency of exposures × number of exposures | Exposure temperature                                              | 0.03         | 1, 553        | 0.86 (0.37)               |
|                                    |                                                                         |                                                                         | Frequency of exposure                                             | 0.48         | 1, 553        | 0.49 (-0.82)              |
|                                    |                                                                         |                                                                         | <b>Number of exposures</b>                                        | <b>18.14</b> | <b>1, 553</b> | <b>&lt; 0.001 (-1.13)</b> |
|                                    |                                                                         |                                                                         | Exposure temperature × Frequency of exposure                      | 3.08         | 1, 553        | 0.08 (-0.06)              |
|                                    |                                                                         |                                                                         | Exposure temperature × Number of exposures                        | 0.99         | 1, 553        | 0.32 (-0.07)              |
|                                    |                                                                         |                                                                         | Frequency of exposure × Number of exposures                       | 0.25         | 1, 553        | 0.62 (0.15)               |
|                                    |                                                                         |                                                                         | <b>Temperature × Frequency of exposures × Number of exposures</b> | <b>29.12</b> | <b>1, 553</b> | <b>&lt; 0.001 (0.01)</b>  |
| Prolonged                          | Y = exposure temperature × time of year exposed and sampled             | Y = time of year exposed and sampled                                    | Exposure temperature                                              | 2.59         | 1, 171        | 0.121 (0.06)              |
|                                    |                                                                         |                                                                         | <b>Time of year</b>                                               | <b>23.07</b> | <b>1, 171</b> | <b>&lt;0.001 (-1.61)</b>  |
| Control                            | Y = time of year sampled                                                | Y = intercept                                                           |                                                                   |              |               |                           |
| Repeated vs. prolonged vs. control | Y = exposure temperature × exposure type                                | Y = exposure type                                                       | <b>Exposure type</b>                                              | <b>6.59</b>  | <b>1, 233</b> | <b>0.011 (-0.77)</b>      |

**Table S4. The effects of freezing temperature exposure on glycogen content in *Eurosta solidaginis* prepupae.** Values are ANCOVA statistics comparing glycogen mass (mg) in *Eurosta solidaginis* prepupae as a result of cold exposure type (repeated exposures, a single exposure, or control conditions at 0 °C), at different temperatures (-10, -15, or -20 °C) as overwintering prepupae. Repeatedly-exposed prepupae received 3, 6, or 10 freezing events of 12 h duration (number of exposures), at a time interval of 1, 5, or 10 days (period between exposures), while prolonged freeze prepupae received a single 120 h freezing exposure either in January or in March (time of year exposed). Control prepupae were sampled in January, February, and March (time of year sampled). Retained terms with significant p-values ( $p < 0.05$ ) are in bold typeface.

| Exposure type                      | Initial model                                                                            | Minimal adequate model                  | Term                                  | F                             | Df                           | P                                |
|------------------------------------|------------------------------------------------------------------------------------------|-----------------------------------------|---------------------------------------|-------------------------------|------------------------------|----------------------------------|
| Repeated                           | Y = protein mass + exposure temperature × period between exposures × number of exposures | Y = protein mass                        | <b>Protein</b>                        | <b>79.200</b>                 | <b>1, 133</b>                | <b>&lt;0.001</b>                 |
| Prolonged                          | Y = protein mass + exposure temperature × time of year exposed and sampled               | Y = protein mass + temperature          | <b>Protein</b><br><b>Temperature</b>  | <b>40.050</b><br><b>6.638</b> | <b>1, 42</b><br><b>1, 42</b> | <b>&lt;0.001</b><br><b>0.014</b> |
| Control                            | Y = protein mass + time of year sampled                                                  | Y = protein mass + time of year sampled | <b>Protein</b><br><b>Time of year</b> | <b>7.016</b><br><b>6.641</b>  | <b>1, 11</b><br><b>2, 11</b> | <b>0.023</b><br><b>0.013</b>     |
| Repeated vs. prolonged vs. control | Y = protein mass + exposure group                                                        | Y = protein mass                        | <b>Protein</b>                        | <b>120.89</b>                 | <b>1, 193</b>                | <b>&lt;0.001</b>                 |

**Table S5. The effects of freezing temperature exposure on glycerol content in *Eurosta solidaginis* prepupae.** Values are ANCOVA statistics comparing glycerol mass (mg) in *Eurosta solidaginis* prepupae as a result of cold exposure type (repeated exposures, a single exposure, or control conditions at 0 °C), at different temperatures (-10, -15, or -20 °C) as overwintering prepupae. Repeatedly-exposed prepupae received 3, 6, or 10 freezing events of 12 h duration (number of exposures), at a time interval of 1, 5, or 10 days (period between exposures), while prolonged freeze prepupae received a single 120 h freezing exposure either in January or in March (time of year exposed). Control prepupae were sampled in January, February, and March (time of year sampled). Retained terms with significant p-values ( $p < 0.05$ ) are in bold typeface.

| Exposure type                      | Initial model                                                                            | Minimal adequate model                                                                   | Term                                 | F             | Df            | P                |
|------------------------------------|------------------------------------------------------------------------------------------|------------------------------------------------------------------------------------------|--------------------------------------|---------------|---------------|------------------|
| Repeated                           | Y = protein mass + exposure temperature × period between exposures × number of exposures | Y = protein mass + exposure temperature × period between exposures × number of exposures | <b>Protein</b>                       | <b>6.971</b>  | <b>1, 116</b> | <b>0.009</b>     |
|                                    |                                                                                          |                                                                                          | Temperature                          | 1.972         | 1, 116        | 0.163            |
|                                    |                                                                                          |                                                                                          | <b>Period</b>                        | <b>3.385</b>  | <b>2, 116</b> | <b>0.037</b>     |
|                                    |                                                                                          |                                                                                          | <b>Number</b>                        | <b>2.530</b>  | <b>2, 116</b> | <b>0.048</b>     |
|                                    |                                                                                          |                                                                                          | <b>Temperature × Period</b>          | <b>10.095</b> | <b>2, 116</b> | <b>&lt;0.001</b> |
|                                    |                                                                                          |                                                                                          | <b>Temperature × Number</b>          | <b>5.752</b>  | <b>2, 116</b> | <b>0.004</b>     |
|                                    |                                                                                          |                                                                                          | Period × Number                      | 1.693         | 4, 116        | 0.156            |
| Prolonged                          | Y = protein mass + exposure temperature × time of year exposed and sampled               | Y = protein mass + exposure temperature × time of year exposed and sampled               | <b>Temperature × Period × Number</b> | <b>5.491</b>  | <b>4, 116</b> | <b>&lt;0.001</b> |
|                                    |                                                                                          |                                                                                          | Protein                              | 0.272         | 1, 38         | 0.605            |
|                                    |                                                                                          |                                                                                          | <b>Temperature</b>                   | <b>5.700</b>  | <b>1, 38</b>  | <b>0.022</b>     |
|                                    |                                                                                          |                                                                                          | <b>Time of year</b>                  | <b>7.713</b>  | <b>2, 38</b>  | <b>0.002</b>     |
| Control                            | Y = protein mass + time of year sampled                                                  | Y = null model                                                                           | Temperature × Time of year           | 2.836         | 2, 38         | 0.071            |
|                                    |                                                                                          |                                                                                          | Protein                              | 0.228         | 1, 85         | 0.634            |
| Repeated vs. prolonged vs. control | Y = protein mass + exposure group                                                        | Y = protein mass + exposure group                                                        | <b>Exposure group</b>                | <b>5.930</b>  | <b>18, 85</b> | <b>&lt;0.001</b> |

**Table S6. The effects of freezing temperature exposure on sorbitol content in *Eurosta solidaginis* prepupae.** Values are ANCOVA statistics comparing sorbitol mass (mg) in *Eurosta solidaginis* prepupae as a result of cold exposure type (repeated exposures, a single exposure, or control conditions at 0 °C), at different temperatures (-10, -15, or -20 °C) as overwintering prepupae. Repeatedly-exposed prepupae received 3, 6, or 10 freezing events of 12 h duration (number of exposures), at a time interval of 1, 5, or 10 days (period between exposures), while prolonged freeze prepupae received a single 120 h freezing exposure either in January or in March (time of year exposed). Control prepupae were sampled in January, February, and March (time of year sampled). Retained terms with significant p-values ( $p < 0.05$ ) are in bold typeface.

| Exposure type                      | Initial model                                                                            | Minimal adequate model                                                    | Term                              | F             | Df            | P                |
|------------------------------------|------------------------------------------------------------------------------------------|---------------------------------------------------------------------------|-----------------------------------|---------------|---------------|------------------|
| Repeated                           | Y = protein mass + exposure temperature × period between exposures × number of exposures | Y = exposure temperature × period between exposures × number of exposures | Temperature                       | 1.224         | 1, 117        | 0.271            |
|                                    |                                                                                          |                                                                           | <b>Period</b>                     | <b>21.755</b> | <b>2, 117</b> | <b>&lt;0.001</b> |
|                                    |                                                                                          |                                                                           | Number                            | 0.019         | 2, 117        | 0.981            |
|                                    |                                                                                          |                                                                           | Temperature × Period              | 1.722         | 2, 117        | 0.183            |
|                                    |                                                                                          |                                                                           | <b>Temperature × Number</b>       | <b>5.080</b>  | <b>2, 117</b> | <b>0.008</b>     |
|                                    |                                                                                          |                                                                           | <b>Period × Number</b>            | <b>8.571</b>  | <b>4, 117</b> | <b>&lt;0.001</b> |
| Prolonged                          | Y = protein mass + exposure temperature × time of year exposed and sampled               | Y = exposure temperature × time of year exposed and sampled               | <b>Temperature</b>                | <b>6.428</b>  | <b>1, 39</b>  | <b>0.015</b>     |
|                                    |                                                                                          |                                                                           | <b>Time of year</b>               | <b>10.651</b> | <b>2, 39</b>  | <b>&lt;0.001</b> |
|                                    |                                                                                          |                                                                           | <b>Temperature × time of year</b> | <b>8.352</b>  | <b>2, 39</b>  | <b>&lt;0.001</b> |
| Control                            | Y = protein mass + time of year sampled                                                  | Y = time of year                                                          | <b>Time of year</b>               | <b>4.716</b>  | <b>2, 12</b>  | <b>0.031</b>     |
| Repeated vs. prolonged vs. control | Y = protein mass + exposure group                                                        | Y = exposure group                                                        | <b>Exposure group</b>             | <b>8.814</b>  | <b>20, 84</b> | <b>&lt;0.001</b> |

**Table S7. The effects of freezing temperature exposure on long-chain triacylglycerol content in *Eurosta solidaginis* prepupae.** Values are ANCOVA statistics comparing long chain triacylglycerol mass (mg) in *Eurosta solidaginis* prepupae as a result of cold exposure type (repeated exposures, a single exposure, or control conditions at 0 °C), at different temperatures (-10, -15, or -20 °C) as overwintering prepupae. Repeatedly-exposed prepupae received 3, 6, or 10 freezing events of 12 h duration (number of exposures), at a time interval of 1, 5, or 10 days (period between exposures), while prolonged freeze prepupae received a single 120 h freezing exposure either in January or in March (time of year exposed). Control prepupae were sampled in January, February, and March (time of year sampled). Retained terms with significant p-values ( $p < 0.05$ ) are in bold typeface.

| Exposure type                      | Initial model                                                                                | Minimal adequate model                                   | Term                       | F              | Df            | P                 |
|------------------------------------|----------------------------------------------------------------------------------------------|----------------------------------------------------------|----------------------------|----------------|---------------|-------------------|
| Repeated                           | Y = total lipid mass + exposure temperature × period between exposures × number of exposures | Y = total lipid mass + temperature + number of exposures | <b>Total lipid mass</b>    | <b>2287.28</b> | <b>1, 13</b>  | <b>&lt; 0.001</b> |
|                                    |                                                                                              |                                                          | <b>Temperature</b>         | <b>4.57</b>    | <b>1, 130</b> | <b>0.0344</b>     |
|                                    |                                                                                              |                                                          | Number                     | 2.98           | 2, 130        | 0.054             |
| Prolonged                          | Y = total lipid mass + exposure temperature × time of year exposed and sampled               | Y = total lipid mass + temperature × time of year        | <b>Total lipid mass</b>    | <b>643.40</b>  | <b>1, 38</b>  | <b>&lt;0.001</b>  |
|                                    |                                                                                              |                                                          | Temperature                | 1.04           | 1, 38         | 0.315             |
|                                    |                                                                                              |                                                          | Time of year               | 1.16           | 2, 38         | 0.324             |
|                                    |                                                                                              |                                                          | <b>Temp × time of year</b> | <b>3.79</b>    | <b>2, 38</b>  | <b>0.032</b>      |
| Control                            | Y = total lipid mass + time of year sampled                                                  | Y = total lipid mass                                     | <b>Total lipid mass</b>    | <b>242.50</b>  | <b>1, 13</b>  | <b>&lt;0.001</b>  |
| Repeated vs. prolonged vs. control | Y = total lipid mass + exposure group                                                        | Y = total lipid mass + exposure group                    | <b>Total lipid content</b> | <b>1189.46</b> | <b>1, 91</b>  | <b>&lt;0.001</b>  |
|                                    |                                                                                              |                                                          | <b>Exposure group</b>      | <b>2.78</b>    | <b>12, 91</b> | <b>0.003</b>      |

**Table S8. The effects of freezing temperature exposure on acetylated triacylglycerol content in *Eurosta solidaginis* prepupae.** Values are ANCOVA statistics comparing acetylated triacylglycerol mass (mg) in *Eurosta solidaginis* prepupae as a result of cold exposure type (repeated exposures, a single exposure, or control conditions at 0 °C), at different temperatures (-10, -15, or -20 °C) as overwintering prepupae. Repeatedly-exposed prepupae received 3, 6, or 10 freezing events of 12 h duration (number of exposures), at a time interval of 1, 5, or 10 days (period between exposures), while prolonged freeze prepupae received a single 120 h freezing exposure either in January or in March (time of year exposed). Control prepupae were sampled in January, February, and March (time of year sampled). Retained terms with significant p-values ( $p < 0.05$ ) are in bold typeface.

| Exposure e type                    | Initial model                                                                                | Minimal adequate model                      | Term                       | F              | Df            | P                 |
|------------------------------------|----------------------------------------------------------------------------------------------|---------------------------------------------|----------------------------|----------------|---------------|-------------------|
| Repeated                           | Y = total lipid mass + exposure temperature × period between exposures × number of exposures | Y = total lipid mass + exposure temperature | <b>Total lipid mass</b>    | <b>2287.28</b> | <b>1, 132</b> | <b>&lt; 0.001</b> |
|                                    |                                                                                              |                                             | <b>Temperature</b>         | <b>6.10</b>    | <b>1, 132</b> | <b>0.0148</b>     |
| Prolonged                          | Y = total lipid mass + exposure temperature × time of year exposed and sampled               | Y = total lipid mass                        | <b>Total lipid mass</b>    | <b>768.90</b>  | <b>1, 43</b>  | <b>&lt;0.001</b>  |
| Control                            | Y = total lipid mass + time of year sampled                                                  | Y = total lipid mass                        | <b>Total lipid mass</b>    | <b>242.50</b>  | <b>1, 13</b>  | <b>&lt;0.001</b>  |
| Repeated vs. prolonged vs. control | Y = total lipid mass + exposure group                                                        | Y = total lipid mass + exposure group       | <b>Total lipid content</b> | <b>2132.58</b> | <b>1, 144</b> | <b>&lt;0.001</b>  |
|                                    |                                                                                              |                                             | <b>Exposure group</b>      | <b>5.90</b>    | <b>4, 144</b> | <b>&lt;0.001</b>  |
